1 **easyFulcrum: An R package to process and analyze ecological sampling data generated using the**

2 **Fulcrum mobile application**

3 Matteo Di Bernardo<sup>‡</sup>, Timothy A. Crombie<sup>‡</sup>, Daniel E. Cook, and Erik C. Andersen\*

4 Department of Molecular Biosciences, Northwestern University, Evanston, IL 60208, USA

5 <sup>‡</sup>Equal contribution

6 \*Corresponding author

7

8 **Erik C. Andersen**

9 Department of Molecular Biosciences

10 Northwestern University

11 4619 Silverman Hall

12 2205 Tech Drive

13 Evanston, IL 60208

14 847-467-4382

15 [erik.andersen@northwestern.edu](mailto:erik.andersen@northwestern.edu)

16 **Running title:** easyFulcrum R package

17 **Keywords:** ecology, field sampling, environmental niche

18 **Emails and ORCIDs:**

19 Matteo Di Bernardo, [matteo.dibernardo@gmail.com](mailto:matteo.dibernardo@gmail.com), 0000-0002-7574-1941

20 Timothy A. Crombie, [tcrombie@northwestern.edu](mailto:tcrombie@northwestern.edu), ORCID 0000-0002-5645-4154

21 Daniel E. Cook, [danielecook@gmail.com](mailto:danielecook@gmail.com), ORCID 0000-0003-3347-562X

22 Erik Andersen, [erik.andersen@northwestern.edu](mailto:erik.andersen@northwestern.edu), ORCID 0000-0003-0229-9651

23

## 24 **Abstract**

25           Large-scale ecological sampling can be difficult and costly, especially for organisms that are too small to  
26 be easily identified in a natural environment by eye. Typically, these microscopic floral and fauna are sampled  
27 by collecting substrates from nature and then separating organisms from substrates in the laboratory. In many  
28 cases, diverse organisms can be identified to the species-level using molecular barcodes. To facilitate large-  
29 scale ecological sampling of microscopic organisms, we used a geographic data-collection platform for mobile  
30 devices called Fulcrum that streamlines the organization of geospatial sampling data, substrate photographs,  
31 and environmental data at natural sampling sites. These sampling data are then linked to organism isolation data  
32 from the laboratory. Here, we describe the easyFulcrum R package, which can be used to clean, process, and  
33 visualize ecological field sampling and isolation data exported from the Fulcrum mobile application. We  
34 developed this package for wild nematode sampling, but it is extensible to other organisms. The advantages of  
35 using Fulcrum combined with easyFulcrum are (1) the elimination of transcription errors by replacing manual  
36 data entry and/or spreadsheets with a mobile application, (2) the ability to clean, process, and visualize sampling  
37 data using a standardized set of functions in the R software environment, and (3) the ability to join disparate data  
38 to each other, including environmental data from the field and the molecularly defined identities of individual  
39 specimens isolated from samples.

## 41 Introduction

42 Ecological studies of small, difficult to identify species are challenging because researchers are  
43 effectively unable to see these species at sampling sites in nature. The ecology of most of these species can  
44 only be studied by sampling substrates from the wild and then separating the species of interest from substrates  
45 in the laboratory. The effort and time required to identify species in the laboratory can make it difficult to  
46 accurately connect the identified specimens back to the ecological data recorded at the site of collection and can  
47 hinder studies of natural populations. Variations of this laborious sampling strategy are used to study the ecology  
48 of many prominent model organisms, including *Caenorhabditis elegans*, *Drosophila melanogaster*, and  
49 *Saccharomyces cerevisiae*, and likely contribute to the comparative sparsity of ecological data for these species  
50 relative to nearly every other aspect of their biology [1–3]. Here, we address some of the difficulties associated  
51 with ecological sampling of small, difficult to identify species by leveraging mobile data collection platforms,  
52 cloud-based databases, and the R software environment.

53 Fulcrum is a customizable, data-collection platform compatible with Apple iOS and Google Android  
54 devices that allows users to collect rich, location-based data (<https://www.fulcrumapp.com>). To facilitate large-  
55 scale ecological surveys of nematodes that are difficult to identify in the field, we developed two custom Fulcrum  
56 applications. The “Nematode field sampling” application allows the user to organize various ecological data types  
57 associated with the substrates sampled in the field, such as environmental parameters and substrate  
58 characteristics, using their mobile device. The “Nematode isolation” application helps organize data associated  
59 with the specimens isolated from samples after they have been brought into the laboratory [4]. Importantly, these  
60 applications are easily extensible to other organisms because Fulcrum uses a powerful GUI to help users  
61 customize data-collection applications even when they have no coding or database administration knowledge.  
62 This utility makes it easy to use Fulcrum’s robust, cloud-based database for sampling nearly any species from  
63 nature. Two key advantages of our approach are improvements in sampling efficiency and data organization,  
64 which translate into more sampling per researcher and greater accuracy when linking isolated specimens back  
65 to the ecological data at the sampling site.

66 Here, we describe the easyFulcrum R package, which contains a suite of functions designed to process  
67 and analyze data exported from Fulcrum and join these data with genotype information if organisms are identified

68 using molecular barcodes. The easyFulcrum package uses standard R packages to rapidly read data into R,  
69 flag anomalies, join diverse data sources, and reformat data in a tidy format [5]. The package also includes  
70 functions to review these data in markdown reports, providing summary statistics, notes on potential anomalies,  
71 and interactive collection maps for discrete sampling projects. When combined, the Fulcrum data-collection  
72 platform and easyFulcrum R package are a powerful tool for collecting and processing ecological data in a  
73 simple, standardized format that can be employed by researchers with limited backgrounds in computer and  
74 data science.

## 75 **Methods**

### 76 **Fulcrum and application customization**

77 The Fulcrum data collection application for Apple iOS or Google Android devices can be downloaded  
78 online (<https://www.fulcrumapp.com>). Fulcrum uses a powerful GUI to allow users to create their own mobile  
79 applications. We created two different applications: Nematode field sampling and Nematode isolation. However,  
80 users can create their own applications for field sampling and isolation. When creating these applications, they  
81 can follow our Fulcrum templates and save their applications with a unique identifier followed by either “field  
82 sampling” or “isolation”. The template for the Nematode field sampling application is here:  
83 [\[https://www.fulcrumapp.com/apps/nematode-field-sampling\]](https://www.fulcrumapp.com/apps/nematode-field-sampling) and the Nematode isolation template is here:  
84 [\[https://www.fulcrumapp.com/apps/nematode-isolation\]](https://www.fulcrumapp.com/apps/nematode-isolation). We provide the minimum requirements for customized  
85 field sampling and isolation applications to work with easyFulcrum (Table 1). For easyFulcrum compatibility,  
86 custom applications must use the same data names for the required fields. When creating custom applications,  
87 the isolation application can be linked to the field sampling application by setting the “Linked App” option in the  
88 C-label field of the isolation application to the name of your field sampling application. If our Worms on Sample  
89 field is not used in the custom isolation application, the “Visibility” and “Requirement” rules in the S-labeled Plates  
90 field must be removed. Other than these requirements, any fields can be added to the customized applications.  
91 The Fulcrum GUI will help guide application creation and/or editing.

92

93 **Table 1. Minimum field requirements for customized field sampling and isolation applications.**

| field sampling application |                       | Isolation application |                  |
|----------------------------|-----------------------|-----------------------|------------------|
| Fields                     | data names            | Fields                | data names       |
| Sample photo               | sample_photo          | C-Label               | c_label          |
| Gridsect                   | gridsect              | Photos                | photos           |
| Substrate Temperature (C)  | substrate_temperature | S-labeled Plates      | s_labeled_plates |
| Ambient Humidity (%)       | ambient_humidity      | Date                  | date             |
| Ambient Temperature (C)    | ambient_temperature_c | Time                  | time             |
| C-Label                    | c_label               |                       |                  |
| Date                       | date                  |                       |                  |
| Time                       | time                  |                       |                  |

94

## 95 **Field sampling with Fulcrum**

96

97

98

99

100

101

102

103

104

105

106

107

108

109

Before going into the field, unique collection labels (C-labels) are generated to distinguish one collection from another and attached to plastic collection bags as scannable QR codes. If no QR codes are used, the labels can be entered manually, but manual entry can lead to later analysis errors and is not recommended. In the field, a user will open the Fulcrum “Nematode field sampling” application and use the device camera to scan a C-label QR code from a collection bag to initiate a new collection record. The user then enters data associated with the sample into the fields of the collection record, including various environmental parameter values and photographic evidence of the sample at the site. This process is then repeated until the desired number of samples are collected. Once the samples are collected, they are brought to the laboratory and enter the specimen isolation workflow. The Nematode field sampling application expedites data recording by automatically recording the GPS location when the user initiates a new collection record. If a new collection record is created away from the sample collection site, the correct GPS location for the collection site can be extracted from the metadata associated with the photo of the sample. Importantly, all the data entered into the collection records are kept locally on the mobile device, whether the device is connected to cellular service or not, and it can be synchronized to the cloud at a later time when service is restored. This feature is useful for field sampling in

110 remote locations. Moreover, with Fulcrum, teams of samplers can work independently at different locations using  
111 separate mobile devices, and all the collection records can be synchronized to the cloud database.

## 112 **Specimen isolation with Fulcrum**

113 The samples collected from the field are processed in a field station or laboratory using the Fulcrum  
114 Nematode isolation application. Here, the user initiates an isolation record for a particular collection by scanning  
115 the C-label QR code attached to the collection bag with the mobile device camera. This step ensures that the  
116 isolation record is linked to the correct collection record in the Fulcrum database. The user then enters  
117 information about the condition of the sample and the estimated number of organisms that are present on the  
118 sample. The user then transfers organisms to isolation containers that are pre-barcoded with unique isolation  
119 labels (S-labels). An isolation label is scanned into the isolation record for each isolated organism so that all  
120 specimens isolated from the sample can be traced back to the original collection record. After isolation, the  
121 specimens can be identified by analysis of morphology or by sequence similarity using molecular barcodes.

## 122 **Specimen identification**

123 We built easyFulcrum to read specimen identification data from a Google sheet to organize genotype  
124 information ([https://docs.google.com/spreadsheets/d/1raf-](https://docs.google.com/spreadsheets/d/1raf-cxWStPovmhHfC6gOLn_9mGJosD8N0ivB7HSuJT4/edit?usp=sharing)  
125 [cxWStPovmhHfC6gOLn\\_9mGJosD8N0ivB7HSuJT4/edit?usp=sharing](https://docs.google.com/spreadsheets/d/1raf-cxWStPovmhHfC6gOLn_9mGJosD8N0ivB7HSuJT4/edit?usp=sharing)). We chose to use a Google sheet for  
126 these data rather than Fulcrum because we identify nematodes by sequence similarity using molecular barcodes  
127 and found it easier to track batches of lysates, PCRs, and BLAST results for S-labels in an online spreadsheet. To  
128 use our genotyping sheet template, right click the “genotyping template” tab on the lower left and select “Copy  
129 to new spreadsheet” then select “Open spreadsheet” to set up a new genotyping sheet for your collection project.  
130 Next, the S-labels for a collection project are exported from Fulcrum and pasted into the genotyping sheet in the  
131 “s\_label” column, as described below. Once the genotyping sheet has the S-labels entered, the data for lysates,  
132 PCRs, BLAST results, and strain names are recorded for each S-label. If the fields in our genotyping sheet are  
133 not appropriate for a particular project, we suggest using the sheet as is but leaving the unnecessary variables  
134 blank.

## 135 Fulcrum data export

136 Before processing collection data using easyFulcrum, the raw Fulcrum data must be exported from the  
137 Fulcrum database using the Fulcrum website's data export tool. We recommend exporting with the following  
138 settings; select the checkboxes for the desired project, include photos, include GPS data, field sampling, and  
139 isolation. The field sampling and isolation data should be exported from the Fulcrum database in comma-  
140 separated value (csv) format and named as follows when exporting from the nematode field sampling and  
141 nematode isolation applications.

- 142 • `nematode_field_sampling_sample_photo.csv`
- 143 • `nematode_field_sampling.csv`
- 144 • `nematode_isolation_photos.csv`
- 145 • `nematode_isolation_s_labeled_plates.csv`
- 146 • `nematode_isolation.csv`

147 If customized Fulcrum applications are used, the [nematode] prefix will be replaced with [your prefix] in the  
148 exported csv files. easyFulcrum will work with any prefix but custom applications must be named [your prefix]  
149 field sampling and [your prefix] isolation. The photos are exported as jpg files named with unique alpha-numeric  
150 record labels from the Fulcrum database. These files must then be moved to the correct location in the project  
151 directory structure to be processed with easyFulcrum, as described below. The easyFulcrum function  
152 `makeDirectoryStructure()` will create the required project directory structure for the user. The csv files are moved  
153 to `[your project directory]/data/raw/fulcrum`, and the jpg files are moved to `[your project`  
154 `directory]/data/raw/fulcrum/photos`.

## 155 easyFulcrum installation

156 Package installation depends on devtools 2.4.1 or later, and R 3.5.0 or later. The package can be installed  
157 using the following command in R: `devtools::install_github("AndersenLab/easyfulcrum")`. Many packages on  
158 which easyFulcrum depends require development prerequisites on MacOS systems, including command line  
159 tools: (<http://www.rstudio.com/ide/docs/packages/prerequisites>). To use easyFulcrum's `procPhotos()` function

160 the *imager* package is required. This package has its own dependencies outside of R, which can be installed  
161 easily following the instructions provided on the package website (<https://dahtah.github.io/imager/>).

## 162 **Data Availability**

163 All source code and example data for the easyFulcrum package are available in a GitHub repository  
164 (<https://github.com/AndersenLab/easyFulcrum>). A vignette of the easyFucrum workflow with example data in the  
165 raw csv and jpg format is available online (<http://andersenlab.org/easyfulcrum/articles/easyFulcrum.html>). The  
166 easyFulcrum R package is open source, and we encourage users to open issues or comment on the GitHub  
167 repository.

## 168 **Results**

### 169 **easyFulcrum overview**

170 The easyFulcrum R package is designed to simplify and standardize the processing of ecological field  
171 sampling data generated using the Fulcrum mobile application. easyFulcrum contains 13 main functions to read,  
172 process, check, join, and summarize collection data for a particular sampling project (Fig 1). This software  
173 package reads raw data and image files exported from the Fulcrum database and genotype data for isolated  
174 organisms sourced from a Google sheet (see Methods). Below, we describe the workflow to process a typical  
175 sampling project using easyFulcrum.



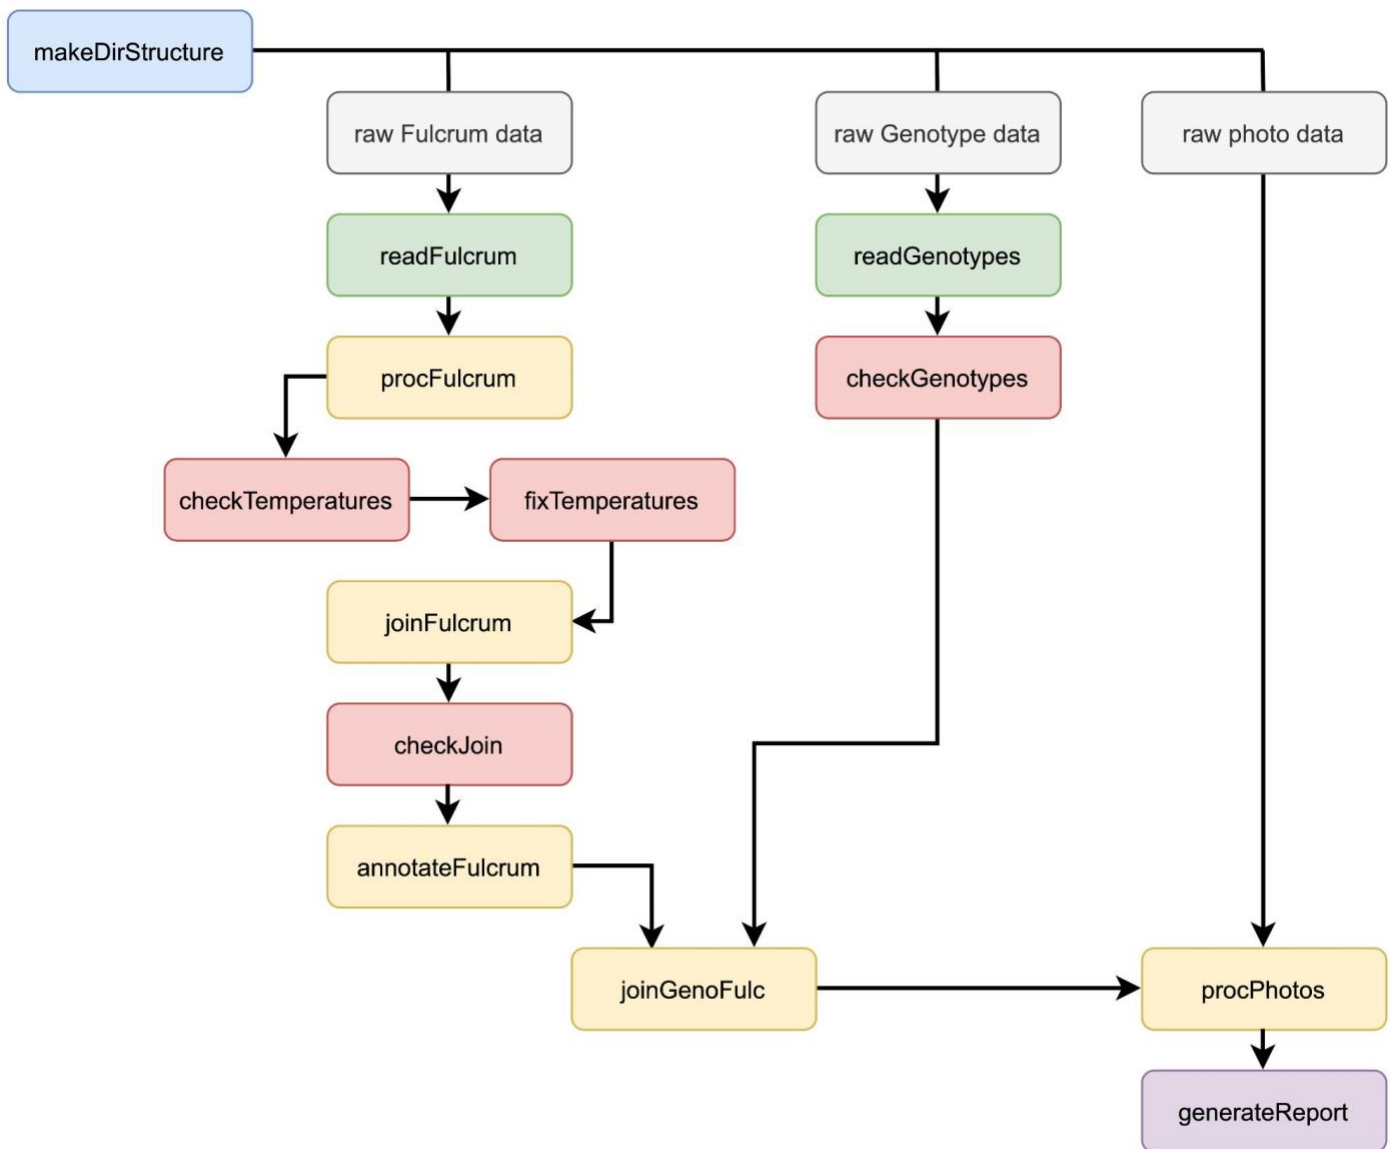

176 **Fig 1. easyFulcrum workflow.** The suggested workflow for processing a sampling project begins with making  
177 a project directory using the *makeDirStructure()* function (blue). The raw Fulcrum and photo data are exported  
178 from the Fulcrum database and loaded into the directory structure manually (grey). The raw genotype data is  
179 sourced directly from a Google sheet (grey). The raw data are read into R using the read functions in green,  
180 processing functions are shown in yellow, checking functions in red, and summarization functions in purple.  
181  
182

## 183 Reading, processing, and joining Fulcrum data

184 easyFulcrum uses a defined directory structure to read raw data files exported from Fulcrum into R and  
185 to write processed output data. We included the *makeDirStructure()* function to create the required directory

186 structure at a location specified by the user (see Methods, Fulcrum data export, Fig 2). After files are loaded into  
187 the directory structure for a collection project, the *readFulcrum()* function reads the raw Fulcrum data files into R  
188 as named dataframes and adds them to a single list object.

189       Once the data are read into R, the *procFulcrum()* function can process each of the five dataframes  
190 independently to standardize temperature, time, altitude, and location data into defined formats. Furthermore,  
191 this function generates ‘flag’ variables that identify anomalies in the data based on unusual temperature values  
192 and misformatted or missing collection labels. By default, *procFulcrum()* converts all temperature values above  
193 40 from Fahrenheit to Celsius, which may not be appropriate for some collection projects, and flags these  
194 records. The *checkTemperatures()* function can be used to display flagged temperature values so that the user  
195 can decide if the conversion was inappropriate. This function also returns values that are flagged if the  
196 temperature probe has recorded identical values across many sequential collections, suggesting that mistakes  
197 could have occurred during temperature data collection. The *fixTemperatures()* function allows the user to revert  
198 improperly converted temperatures back to the original value after review and to eliminate any erroneous  
199 temperature values. Given that temperature unit errors are quite frequent, we have provided the easy to use  
200 *fixTemperature()* function such that even beginner R users can use the software to correct temperature values.  
201 After reverting all values that were improperly converted or eliminating erroneous temperature values, the user  
202 can run *checkTemperatures()* again to determine if the flagged values were corrected.

203       After processing the Fulcrum data and addressing temperature anomalies, the *joinFulcrum()* function is  
204 used to join the processed Fulcrum dataframes together. The function first joins the *field\_sampling* dataframe to  
205 the *isolation* dataframe using unique alpha-numeric collection and isolation record identifiers exported from the  
206 Fulcrum database. Following this step, *joinFulcrum()* then selects the best photo for each collection record. If  
207 multiple photos exist for a single collection record, the best photo is chosen based on an estimate of GPS  
208 accuracy, which is extracted from the photo metadata in the *field\_sampling\_sample\_photo* dataframe. Most  
209 modern mobile phones have a built-in GPS receiver that stores location information in the photo metadata when  
210 a picture is taken. The “*exif\_gps\_dop*” variable is a measure related to the GPS degree of precision that is  
211 exported from Fulcrum in units of meters. We select the photo with the smallest value corresponding to the  
212 highest GPS degree of precision. Once the best photos are selected, the unique photo record identifiers and

213 GPS locations from the best photos are joined to the previous joined dataframe. *joinFulcrum()* then adds two  
214 location variables to the joined dataframe, one for the best photo GPS locations, and another for the GPS  
215 locations recorded at the time the collection records were generated. We recommend users prioritize the best  
216 photo GPS locations when available because we have found that they are typically closer to the actual sampling  
217 sites than the GPS locations recorded at the time the collection records were generated using Fulcrum. The S-  
218 labels are then added when the processed `isolation_s_labeled_plates` dataframe is joined to the previous  
219 dataframe on the basis of the unique isolation records. Finally, the *joinFulcrum()* function adds flags for extreme  
220 temperatures and altitude values, duplicated or missing C-labels or S-labels, and variables indicating whether  
221 the final collection location should be taken from the photo metadata or from the location at the time the collection  
222 record was generated. If needed, the *joinFulcrum()* function can handle the special case where isolation data  
223 are not generated and only the `field_sampling` and `field_sampling_sample_photo` dataframes exist. The  
224 *checkJoin()* function will display flags and indicate which of the input Fulcrum data files had errors. Because the  
225 R interface does not provide easy cell-by-cell manipulations once data are entered into the R workspace, the  
226 best method to fix errors is to alter flagged errors in R using the functions provided in `easyFulcrum`. Raw  
227 collection or isolation data should never be altered.

228 Finally, the optional *annotateFulcrum()* function maps collection locations to geographic features that the  
229 user can input based on the processed longitude and latitude of the sample. This function allows the user to  
230 input bounding boxes or polygons for known geographic features such as islands, trails, parks, and mountains.  
231 The *annotateFulcrum()* function acts as a wrapper for the `sp::over` function and will determine if a collection is  
232 located within any of the supplied geographic features and add these location descriptions to the dataframe [6].  
233 Users that are unfamiliar with geospatial data can create geojson polygon points via a simple online mapping  
234 service [<https://boundingbox.klokantech.com>], which can be supplied to *annotateFulcrum()* following the  
235 `easyFulcrum` vignette.

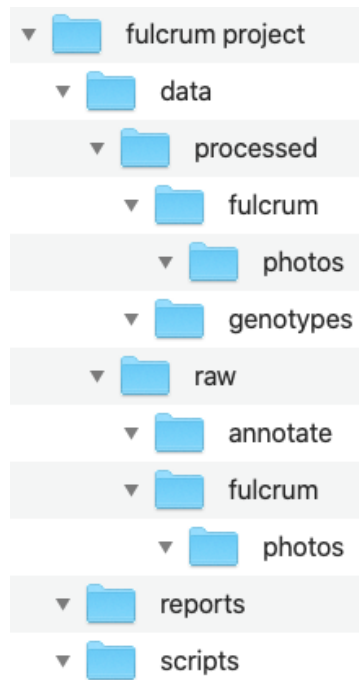

**Fig 2. easyFulcrum directory structure.** The *makeDirStructure()* function will produce the directory structure shown above. In this directory structure, the *data* folder represents the main subfolder containing both raw and processed Fulcrum data. The *data/raw/fulcrum* subfolder contains the five raw comma-separated value csv files exported from the Fulcrum website and the *data/raw/fulcrum/photos* subfolder contains the exported photos in jpg format (see Methods, Fulcrum Export) files exported from Fulcrum. The *data/raw/annotate* subfolder can be used to hold spatial annotation files that are used by the *annotateFulcrum()* function to relate sampling sites to known geographical features. The *data/processed/fulcrum* subfolder holds the processed collection data and photos exported by easyFulcrum functions. The *reports* directory is the default location for saving collection reports generated with the *generateReport()* function which is described in more detail in the text.

## Reading, processing, and joining genotyping results

After the processing and joining of Fulcrum data from the field sampling and laboratory isolation applications, easyFulcrum joins these data with genotyping data for the specimens isolated from the field samples. The genotyping data, often generated from Sanger sequence of isolated organisms, is pulled from a standardized Google Sheet format and filled with collection-specific data generated by the user. We refer to this data source as the genotyping sheet (see, Methods). The *readGenotypes()* function performs the import of the genotyping sheet by using the *googlesheets4* R package developed for this purpose [7]. Once the genotyping

255 data are read into R, the *checkGenotypes()* function searches the genotyping data, flagging isolations with  
256 missing, improper, and/or duplicated S-labels, and performs other checks, including if the species description,  
257 strain name, proliferation label, or ITS2 genotype are missing. The *checkGenotypes()* function also reads the  
258 joined Fulcrum data to check if disparities exist between the S-labels in the genotyping and Fulcrum data. Again,  
259 given limited R functionalities in cell-by-cell manipulations, we suggest for the user to make edits to data  
260 programmatically using functions provided in *easyFulcrum*. Following these checks, the *joinGenoFulc()* function  
261 joins the Fulcrum and genotyping data by their shared S-labels. This function can also save an RDS file of the  
262 processed genotyping data in */data/processed/genotypes* for fast data import in the future.

## 263 **Reading, processing, and joining collection images**

264 Once the genotyping and Fulcrum data are joined, the *procPhotos()* function can be used to copy,  
265 rename, and generate thumbnails of raw image files in *data/raw/fulcrum/photos*, so that they can be viewed more  
266 easily in interactive reports or online. The *procPhotos()* function renames the photos to the C-label names rather  
267 than the unique record identifiers names exported from Fulcrum. The renamed, full-size images are saved in the  
268 */data/processed/fulcrum/photos* subdirectory and the renamed thumbnails are saved in the  
269 */data/processed/fulcrum/photos/thumbnails* subdirectory. This function also allows for collection photos to be  
270 processed to fit criteria for specific community-wide data repositories, like the *C. elegans* Natural Diversity  
271 Resource [8]. The final output to the R environment is a single data frame identical to the output from  
272 *joinGenoFulc()* but with variables added to describe the original and processed file paths for all sample photos.

## 273 **Generating summary and output files**

274 The *generateReport()* function can be used to generate a summary report for a collection project. This  
275 function passes collection data to an example R markdown file *sampleReport.Rmd*, which is contained in the  
276 package. The *generateReport()* function will write the example *sampleReport.Rmd* to the */scripts* subfolder and  
277 knit a report in HTML format to the */reports* subfolder, which can be reviewed in any web browser (Fig 3). The  
278 *sampleReport.Rmd* file is provided to the user as a project summary template and can be edited as the user  
279 requires. The *sampleReport.Rmd* function includes code to summarize metadata relating to the collection and  
280 isolation, such as who conducted the respective processes and on what dates steps were completed. The  
281 markdown also provides summary tables of data relating to the collections and isolations. Additionally, we

282 included functions to generate interactive maps of sampling sites (Fig 3A) and box plots of environmental  
283 parameters recorded at sampling sites, such as substrate temperature, ambient temperature, humidity, and  
284 elevation using the ggplot2 and leaflet R packages (Fig 3B) [9,10]. The workflow vignette can be used to generate  
285 a project summary HTML report using the example data included in the package.

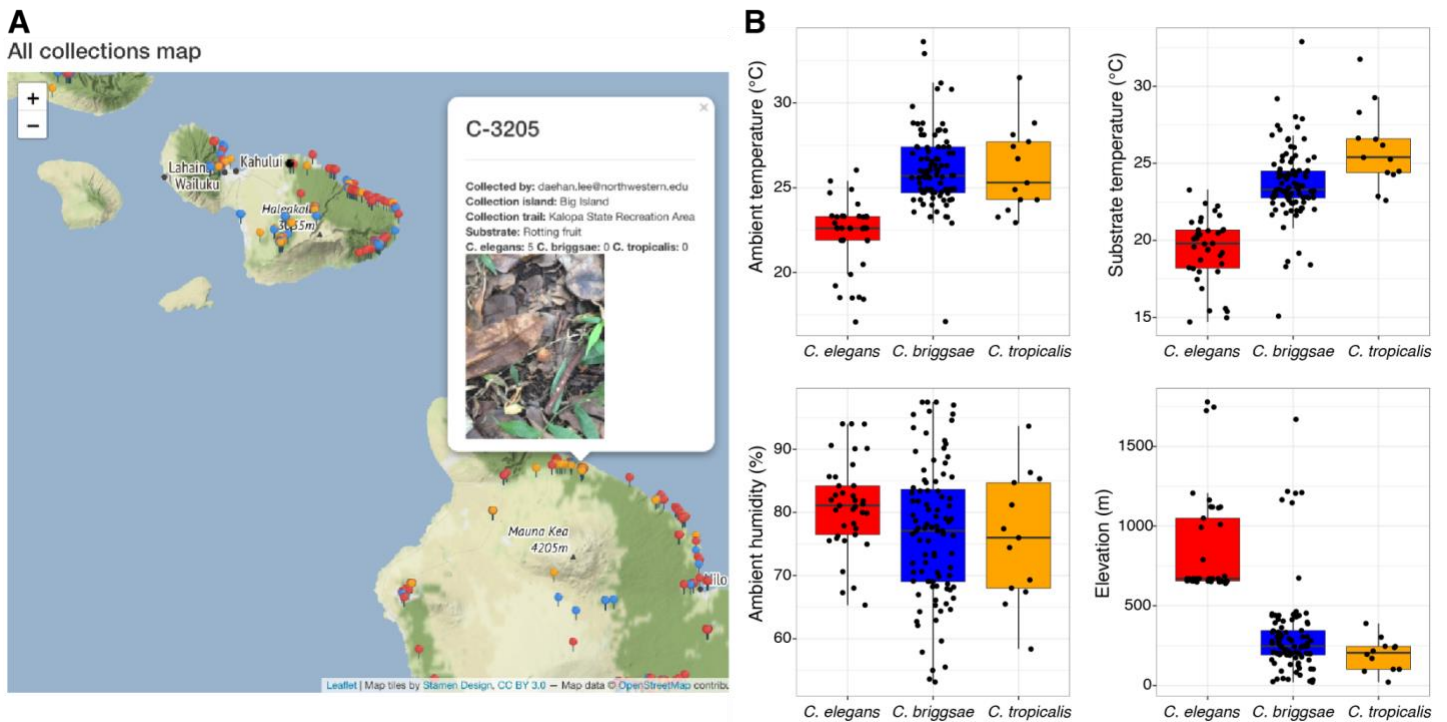

286  
287 **Fig 3. Sample report attributes.** The *makeReport()* function will render an HTML file with interactive maps of  
288 the collections, summary plots of the collection data, and other sections summarizing a collection project. (A) A  
289 screenshot of the interactive map with a pop-up caption for a specific collection label C-3205 is shown. The  
290 substrate photo is included in the pop-up. The pins on the map represent distinct collection sites and are colored  
291 to indicate the presence of nematodes on the sample (red), no nematodes on the sample (blue), only nematode  
292 tracks on the sample (orange). (B) Environmental parameter values, including ambient temperature, substrate  
293 temperature, ambient humidity, and elevation for collection sites where *Caenorhabditis* nematodes were found  
294 are shown. Tukey box plots are plotted by species (colors) for each environmental parameter.

## 295 Conclusions

296 The easyFulcrum R package offers an organized workflow for processing ecological sampling data  
297 generated using the Fulcrum mobile application. The package provides simple and efficient functions to clean,

298 process, and visualize ecological field sampling and isolation data collected using custom Fulcrum applications.  
299 It also provides functions to join these data with genotype information if organisms isolated from the field are  
300 identified using molecular barcodes. Together, the Fulcrum mobile application and easyFulcrum R package allow  
301 researchers to easily implement mobile data-collection, cloud-based databases, and standardized data analysis  
302 tools to improve ecological sampling accuracy and efficiency, while simultaneously enabling reproducible  
303 analysis and downstream integration with other R packages.

304

## Acknowledgements

We would like to thank members of the Andersen laboratory past and present for their helpful suggestions and feedback developing easyFulcrum.



## References

1. Petersen C, Dirksen P, Schulenburg H. Why we need more ecology for genetic models such as *C. elegans*. *Trends Genet.* 2015;31: 120–127. doi:10.1016/j.tig.2014.12.001
2. Libkind D, Peris D, Cubillos FA, Steenwyk JL, Oplente DA, Langdon QK, et al. Into the wild: new yeast genomes from natural environments and new tools for their analysis. *FEMS Yeast Res.* 2020;20. doi:10.1093/femsyr/foaa008
3. Behrman EL, Howick VM, Kapun M, Staubach F, Bergland AO, Petrov DA, et al. Rapid seasonal evolution in innate immunity of wild *Drosophila melanogaster*. *Proc Biol Sci.* 2018;285. doi:10.1098/rspb.2017.2599
4. Crombie TA, Zdraljevic S, Cook DE, Tanny RE, Brady SC, Wang Y, et al. Deep sampling of Hawaiian *Caenorhabditis elegans* reveals high genetic diversity and admixture with global populations. *Elife.* 2019;8. doi:10.7554/eLife.50465
5. Wickham H. Tidy Data. *Journal of Statistical Software, Articles.* 2014;59: 1–23. doi:10.18637/jss.v059.i10
6. Pebesma E, Bivand RS. S classes and methods for spatial data: the sp package. *R news.* 2005;5: 9–13. Available: [https://cran.r-project.org/web/packages/sp/vignettes/intro\\_sp.pdf](https://cran.r-project.org/web/packages/sp/vignettes/intro_sp.pdf)
7. Bryan J. googlesheets4: Access Google Sheets using the Sheets API V4. 2020. Available: <https://CRAN.R-project.org/package=googlesheets4>
8. Cook DE, Zdraljevic S, Roberts JP, Andersen EC. CeNDR, the *Caenorhabditis elegans* natural diversity resource. *Nucleic Acids Res.* 2017;45: D650–D657. doi:10.1093/nar/gkw893
9. Graul C. leafletR: Interactive Web-Maps Based on the Leaflet JavaScript Library. 2016. Available: <http://cran.r-project.org/package=leafletR>
10. Wickham H. ggplot2: Elegant Graphics for Data Analysis. Springer-Verlag New York; 2016. Available: <https://ggplot2.tidyverse.org>
